# Supplementary material
Source: HighWire-hosted journal article supplement (https://mct.aacrjournals.org/content/suppl/2013/10/09/1535-7163.MCT-13-0401)
Supplement: figleg.pdf [file figleg.pdf]

## Supplementary figure legends

**Figure S1.** Structures of drugs used in these studies.

**Figure S2.** Immunofluorescence microscopy of drug treated HUVEC. Cells grown on glass coverslips were incubated overnight without drug (A) or in the presence of 1 nM paclitaxel (B), 10 nM paclitaxel (C), 1 nM vinblastine (D), 10 nM vinblastine (E), or 100 nM vinblastine (F). The cells were then stained with an antibody to  $\alpha$ -tubulin to label microtubules (green) and with DAPI to label nuclear DNA (red). The bar in panel A is 10  $\mu$ m.

**Movie 1.** Migration of HUVEC. Cells moving into a scratch wound were photographed 1 min apart with a 40X phase objective. The movie consists of 180 photographs shown at 5 frames/s.

**Movie 2.** Migration of HUVEC in the presence of 1 nM paclitaxel. Cells moving into a scratch wound were photographed 1 min apart with a 40X phase objective. The movie consists of 180 photographs shown at 5 frames/s.

**Movie 3.** Migration of HUVEC in the presence of 100 nM vinblastine. Cells moving into a scratch wound were photographed 1 min apart with a 40X phase objective. The movie consists of 180 photographs shown at 5 frames/s.
